# Supplementary material
Source: PubMed Central journal article supplement (PMC4375247)

## Supplementary Appendix

This appendix has been provided by the authors to give readers additional information about their work.

Supplement to: Criner GJ, Connett JE, Aaron SD, et al. Simvastatin for the prevention of exacerbations in moderate-to-severe COPD. *N Engl J Med* 2014;370:2201-10. DOI: [10.1056/NEJMoa1403086](https://doi.org/10.1056/NEJMoa1403086)

## Table of Contents

### Section A. List of Collaborators

### Section B. Tables

- a. Table S1. Complete Demographics of all patients enrolled into STATCOPE
- b. Table S2. Effect of Simvastatin on Severity of Acute Exacerbations
- c. Table S3. Effect of Simvastatin on Hospitalizations
- d. Table S4. Counts, Rates of Exacerbations (per person-year), by Severity and by Treatment Group: Means  $\pm$  Standard Deviations
- e. Table S5. Effect of Simvastatin on Secondary Outcomes Change from Baseline to Last Measure, Per Person Year.
- f. Table S6. Reasons for Study Drug Discontinuation by Treatment Assignment.
- g. Table S7. Reasons for Withdrawal
- h. Table S8. Treatment of Acute Exacerbations with Glucocorticosteroids and Antibiotics in Simvastatin vs. Placebo Groups.
- i. Table S9: Lipid Levels at Baseline and 12 months by Treatment Group (Mean  $\pm$  SDEV)

### Section C. Figures

- a. Figure S1. Effect of Gender on Time to First Exacerbation.
- b. Figure S2. Histogram of Number of Exacerbations per Participant by Study Drug Assignment
- c. Figure S3. Forest Plot of Influence of GOLD Stage, Age, Whether Prescribed Oxygen or Not, Smoking Status, Gender and Clinical Center on Response to Simvastatin Treatment.

## Section A. List of Collaborators

### Collaborators

#### NHLBI COPD Clinical Research Network (CRN)

**Brigham and Women's Hospital (Affiliated Sites: Reliant Medical Group, VABoston Healthcare System)** – G R Washko (PI), Carolyn Come (CO-PI), S McQuaid (Coordinator)  
**Cleveland Clinic** – J Stoller (PI), R Rice (Coordinator) **Denver Health** - R Albert (PI), C Verano (Coordinator), J Underwood (Coordinator) **Geisinger Medical Center** - P Simonelli (PI), M Kopfinger (Coordinator) **Health Partners Research Foundation** – C McEvoy (PI), L Loes (Coordinator) **Los Angeles Biomedical Research Institute at Harbor-UCLA Medical Center** - R Casaburi (PI), J Porszasz (Co-PI), K Norulak (Coordinator), D Cavanaugh (Coordinator) **Mayo Clinic Rochester Minnesota** - P Scanlon (PI), C Bornhorst (Coordinator), B Andrist (Coordinator) **Minneapolis VA Health Care System** - D Niewoehner (PI), A Fabbrini (Coordinator), S Johnson (Coordinator) **National Jewish Health** - B Make (PI), J Underwood (Coordinator) **NF/SG VA Medical Center** - P Sriram (PI), R Kizza (Coordinator), A Thomas (Coordinator), K Herring (Coordinator) **Ohio State University** - P Diaz (PI), K Martin (Coordinator) **Oregon Health & Science University** - A Khan (PI), N Kessler (Coordinator) **Pulmonary Section Birmingham VAMC** - J.A Cooper Jr (PI), P Smith (Coordinator), J Bowden (Coordinator) **Reliant Medical Group** - R Rosiello (PI), A McDonald (Coordinator), K Allain (Coordinator) **Respiratory Specialists Wyomissing, PA** - A Platt (PI), L Hill (Coordinator) **Section of Pulmonary and Critical Care Medicine, Baylor College of Medicine** - N Hanania (PI), M Atik (Coordinator), M.S Gozegir (Coordinator), A Alobaidy (Coordinator) **St. Luke's Hospital and Health Network** - M Turki (PI), E Christ (Coordinator), E Taff (Coordinator) **Temple University** - G Criner (PI), W Chatila (Co-PI), N Marchetti (Co-Investigator), P Desai (Co-Investigator), K Shenoy (Co-Investigator), S Weaver (Co-Investigator), V Kim (Co-Investigator), A.J Mamary (Co-Investigator) L.H Criner (Coordinator), D Fehrle (Coordinator), Rosario (Coordinator), L Hao (Coordinator), D Lebo (Pharmacist), C Mandapati (Research Assistant), D Lebo (Pharmacist) **The Institute for Respiratory and Sleep Medicine** - H Lee (PI), M Ianacone (Coordinator) **University of Alabama Birmingham** - M Dransfield (PI), W Bailey (PI-Co-Investigator), J M Wells (Co-Investigator), S P Bhatt (Co-Investigator), K Mathews (Coordinator), T Renda (Coordinator), V Roper (Coordinator), N Seabron (Coordinator), Sherry Tidwell (Coordinator) **University of CA San Francisco** - S Lazarus (PI), P Woodruff (Co-Investigator), S Chodagiri (Coordinator), K Patterson (Coordinator) **University of Illinois at Chicago** - J Krishnan (PI), J DeLisa (Coordinator), V Morken (Coordinator), N Bracken (Research Nurse) **University of Maryland** - S Scharf (PI), R Reed (Co-PI), W Bell-Farrell (Coordinator), T Fitzgerald (Coordinator) **University of Michigan** - F Martinez (PI), M Han (Co-PI), R Hyzy (Co-Investigator), S Gay (Co-Investigator), J Curtis (Co-Investigator), K Chan (Co-Investigator), K Bauman (Co-Investigator), C Nowak (Coordinator), L McCloskey (Coordinator), C Meldrum (Coordinator), C Rysso

(Coordinator), D Thompson (Coordinator), D Dahlgren (Coordinator), M K Hamby (Coordinator) **University of Pittsburgh** - F Scieurba (PI), J Bon (Co-Investigator), D Chandra (Co-Investigator) J Tedrow (Co-Investigator), M Beckner (Coordinator), J Mastalski (Coordinator) L Kniolek (Coordinator) **University of Utah Health Sciences Center** - R Kanner (PI), J Carle (Coordinator), G. M Villegas (Coordinator) **VA Boston Healthcare System** - M Moy (PI), D Mullin (Coordinator), O Okunbor (Coordinator) **VA Medical Center** - J L. Curtis (PI), L McCloskey (Coordinator) **Western New York Veterans Administration Healthcare System and University at Buffalo** - M.J Mador (PI), A Rahman (Coordinator) **Data Coordinating Center University of Minnesota** - J Connett (PI), C Wendt (Co-PI), S Harnden (Study Coordinator), I Olson (Quality Control), W Patrek (Study Coordinator), H Voelker (Program Manager)

### **Canadian Contributors:**

**Ottawa Hospital Research Institute** - S Aaron (PI), G Pratt (Coordinator), K Vandemheen, (Program Manager), S Yogasingam (Research Assistant), J Coughlin (Research Assistant), T Ramsay (Statistician) **Renfrew Victoria Hospital** - J Leech (PI), M Magill (Coordinator) **St. Pauls Hospital** - D Sin (PI), B Tan (Coordinator) **Vancouver Coastal Health** - J Road (PI), J Swiston (Co-Investigator), M Fitzgerald (Co-Investigator), L Legkaia (Coordinator) **Lions Gate Hospital** - R Mainra (PI), A Mainra (Coordinator) **Royal Columbian Hospital** - S Malhotra (PI) **Surrey Memorial Hospital** - A McNamara (PI), TJ Jagpal (Coordinator) **St Boniface Hospital** - S Sharma (PI), C Newman (Coordinator), C Noble (Coordinator) **Queen Elizabeth II Health Sciences Center** - P Hernandez (PI), A Dale (Coordinator) **University of Calgary** - R Cowie (PI), R Leigh (Co-PI), S Field (Co-PI), L Knox (Coordinator) **University of Alberta** - E Wong (PI), F Luke (Coordinator) **Institut Universitaire de Cardiologie et de Pneumologie de Québec** - J Milot (PI), F Maltais (Co-Investigator), MJ Breton (Coordinator) **Jewish General Hospital** - M Palayew (PI), G Ricafort (Coordinator) **Inspiration Research Limited** - K Chapman (PI), J He (Coordinator), N Audisho (Coordinator) **Grey Bruce Health Services** - M Newton (PI), C Banks (Coordinator) **Royal University Hospital** - D Marciniuk (PI), J Baran (Coordinator)

### **Temple University School of Pharmacy cGMP**

David Lebo, Michael Jacobs

### **NHLBI**

GG Weinmann, TL Croxton, A Punturieri, M Stylianou

### **DSMB**

A Wanner (Chairman), B Bender, C Dujovne, S Kelsey, J. R Landis, B Phillips, G Turino, R Veatch, A.L. Waldo.

## Section B. Tables

**Table S1. Complete demographics of participants enrolled into STATCOPE**

| Characteristic                                                     | Simvastatin (n=433) | Placebo (n=452)      |
|--------------------------------------------------------------------|---------------------|----------------------|
| Age- yrs.                                                          | 62.2 (8.5)          | 62.3 (8.4)           |
| Female gender-no. (%)                                              | 184 (42.49%)        | 203 (44.9%)          |
| Hispanic-no. (%)                                                   | 4 (0.9%)            | 7 (1.5%)             |
| Race-no. (%)                                                       |                     |                      |
| White                                                              | 328 (75.8%)         | 346 (76.5%)          |
| Black                                                              | 99 (22.9%)          | 91 (20.1%)           |
| Other                                                              | 4 (0.9%)            | 4 (0.9%)             |
| Multiethnic                                                        | 2 (0.5%)            | 11 (2.4%)            |
| Post-bronchodilator FEV <sub>1</sub>                               |                     |                      |
| Liters                                                             | N=430 1.2 (0.6)     | N=449 1.2 (0.6)      |
| % predicted                                                        | N=430 41.5% (17.8%) | N=449 41.6% (17.6%)  |
| FEV <sub>1</sub> /FVC                                              | N=430 44.4% (12.6%) | N=449 44.3% (13.48%) |
| Gold Stage-no. (%)                                                 |                     |                      |
| II                                                                 | 142 (33%)           | 145 (32.3%)          |
| III                                                                | 142 (33%)           | 163 (36.3%)          |
| IV                                                                 | 146 (34%)           | 141 (31.5%)          |
| Smoking history-pack-yr.                                           | 50.0 (26.1)         | 51.2 (28.7)          |
| Current smoker-no. (%)                                             | 133 (30.7%)         | 143 (31.6%)          |
| COPD Medications-no. (%)                                           |                     |                      |
| ICS only                                                           | 14 (3.2%)           | 12 (2.65%)           |
| LAMAs only                                                         | 29 (6.7%)           | 35 (7.7%)            |
| LABAs only                                                         | 10 (2.3%)           | 10 (2.2%)            |
| ICS + LAMA                                                         | 5 (1.15%)           | 9 (2.0%)             |
| ICS+ LABA                                                          | 71 (16.4%)          | 89 (19.7%)           |
| LAMA + LABA                                                        | 25 (5.8%)           | 23 (5.1%)            |
| ICS + LAMA + LABA                                                  | 223 (51.50%)        | 228 (50.4%)          |
| None                                                               | 56 (12.9%)          | 46 (10.2%)           |
| Entry Criteria                                                     |                     |                      |
| AECOPD < 12 prior mo.<br>Requiring hospitalization or<br>ER visits | 216 (49.9%)         | 238 (52.7%)          |
| Systemic steroids or<br>antibiotics < 12 prior mo.                 | 367 (84.75%)        | 382 (84.5%)          |
| Long-term oxygen- no. (%)                                          | 198 (45.7%)         | 222 (49.1%)          |
| Long-term oxygen as only<br>criterion- no. (%)                     | 48 (11.1%)          | 53 (11.7%)           |

There were no significant differences between simvastatin and placebo groups.

**Definition of abbreviations:** FEV<sub>1</sub>, forced expiratory volume in one second; FVC, forced vital capacity; GOLD, Global Initiative in Obstructive Lung Disease; ICS, inhaled corticosteroids; LAMAs, long acting muscarinic antagonists; LABAs, long acting beta-2 agonists; AECOPD, acute exacerbations of COPD

**Table S2. Effect of Simvastatin on Severity of Acute Exacerbations**

| Event                     | Simvastatin   |                                   | Placebo       |                                   |
|---------------------------|---------------|-----------------------------------|---------------|-----------------------------------|
|                           | No. of events | Mean events/ patient yr. (95% CI) | No. of events | Mean events/ patient yr. (95% CI) |
| AECOPD                    |               |                                   |               |                                   |
| Hospitalizations          | 205           | 0.31 [0.24,0.38]                  | 240           | 0.31 [0.23,0.38]                  |
| ER or urgent visits       | 123           | 0.17 [0.13,0.22]                  | 138           | 0.24 [0.16,0.32]                  |
| Unscheduled office visits | 637           | 0.85 [0.73,0.97]                  | 639           | 0.81 [0.70,0.93]                  |
| Intubations               | 12            | 0.03 [0.00,0.05]                  | 19            | 0.03 [0.01,0.04]                  |

**Definitions of abbreviations:** ER, emergency room; AECOPD, acute exacerbations of COPD

**Table S3. Effect of Simvastatin on Hospitalizations.**

| Event                      | Statin        |                                  | Placebo       |                                  | P Value |
|----------------------------|---------------|----------------------------------|---------------|----------------------------------|---------|
|                            | No. of events | Mean events/patient yr. (95% CI) | No. of events | Mean events/patient yr. (95% CI) |         |
| All cause Hospitalizations | 369           | .63 [.49,.76]                    | 414           | .67 [.52,.82]                    | 0.539   |

**Table S4. Counts, Rates of Exacerbations (per person-year), by Severity and by Treatment Group: Means  $\pm$  Standard Deviations**

| <b>Treatment Group</b> | <b>Mild Exacerbations</b> | <b>Moderate Exacerbations</b> | <b>Severe Exacerbations</b> | <b>Very Severe Exacerbations</b> | <i>All Exacerbations</i> |
|------------------------|---------------------------|-------------------------------|-----------------------------|----------------------------------|--------------------------|
| Simvastatin            |                           |                               |                             |                                  |                          |
| Count                  | 1.48 $\pm$ 2.15           | 0.29 $\pm$ 0.71               | 0.45 $\pm$ 0.98             | 0.03 $\pm$ 0.18                  | 2.24 $\pm$ 2.75          |
| Rate                   | 0.85 $\pm$ 1.25/pyr       | 0.17 $\pm$ 0.47/pyr           | 0.31 $\pm$ 0.75/pyr         | 0.03 $\pm$ 0.23/pyr              | 1.36 $\pm$ 1.61/pyr      |
| Placebo                |                           |                               |                             |                                  |                          |
| Count                  | 1.43 $\pm$ 2.21           | 0.31 $\pm$ 0.73               | 0.49 $\pm$ 1.24             | 0.04 $\pm$ 0.23                  | 2.28 $\pm$ 2.94          |
| Rate                   | 0.81 $\pm$ 1.24/pyr       | 0.24 $\pm$ 0.85/pyr           | 0.31 $\pm$ 0.81/pyr         | 0.03 $\pm$ 0.17/pyr              | 1.39 $\pm$ 1.73/pyr      |

P-values for differences between groups in rates (negative binomial model):

1. All exacerbations: p = 0.728
2. Moderate or worse exacerbations: p = 0.200
3. Severe or very severe exacerbations: p = 0.420



**Table S5. Effect of Simvastatin on Secondary Outcomes Change from Baseline to Last Measure per Person-Year (Median, 10<sup>th</sup>, 90<sup>th</sup> percentile) \*.**

| Outcome                    | Simvastatin           | Placebo               | P Value |
|----------------------------|-----------------------|-----------------------|---------|
|                            | N=356                 | N=356                 |         |
| FVC, % pred.               | -0.83 ( -7.19, 5.28)  | -0.93 ( -7.16, 5.40)  | .6832   |
| FEV <sub>1</sub> , % pred. | -0.86 (-11.04, 8.67)  | -1.81 (-10.62, 7.10)  | .1461   |
| FEV <sub>1</sub> /FVC      | -0.21 ( -6.19, 5.47)  | -0.21 ( -5.04, 5.98)  | .3581   |
|                            |                       |                       |         |
| SGRQ                       | N=370                 | N=383                 |         |
| Symptom                    | -0.78 (-17.29, 12.52) | -1.69 (-21.20, 11.62) | .2628   |
| Activity                   | 0.00 (-13.36, 9.56)   | 0.00 (-12.32, 14.14)  | .2205   |
| Impact                     | 0.00 (-12.25, 13.37)  | 0.00 (-14.41, 13.22)  | .9548   |
| Total                      | -0.18 (-11.01, 9.70)  | 0.02 (-12.47, 10.73)  | .3783   |
|                            |                       |                       |         |
| SF-36                      | N=370                 | N=382                 |         |
| Health in last year        | 0.00 (-19.98, 26.39)  | 0.00 (-24.48, 24.61)  | .7210   |
| Physical function          | 0.00 (-19.64, 16.01)  | 0.00 (-16.66, 17.18)  | .5585   |
| Role Physical              | 0.00 (-30.78, 37.20)  | 0.00 (-33.66, 36.62)  | .1359   |
| Role Emotional             | 0.00 (-32.88, 33.07)  | 0.00 (-34.01, 33.36)  | .3023   |
| Energy                     | 0.00 (-14.13, 15.92)  | 0.00 (-18.39, 12.06)  | .3458   |
| Emotional Wellbeing        | 0.00 (-12.11, 9.68)   | 0.00 (-14.05, 11.84)  | .7620   |
| Social Function            | 0.00 (-21.55, 20.50)  | 0.00 (-24.55, 20.90)  | .9167   |
| Pain                       | 0.00 (-20.62, 20.73)  | 0.00 (-20.07, 17.94)  | .4952   |
| Gen Health                 | 0.00 (-14.94, 14.78)  | 0.00 (-19.43, 15.28)  | .5592   |
|                            |                       |                       |         |

**Definition of abbreviations:** FVC, forced vital capacity; FEV<sub>1</sub>, forced expiratory volume in one second; SGRQ, St Georges' Respiratory Questionnaire; SF-36, Medical Outcomes Study 36-item Short Form Health Survey.

\* Change was calculated: (last followup-baseline)/ (Time at baseline to Time at last followup /365.25)

The SGRQ has a range of scores from 0-100 with lower scores indicating better functioning and the minimal important clinical difference is considered to be -4 units. The SF-36 is a self-administered general health questionnaire of 36 items that generates scores across 8 health dimensions. Scores range from 0-100; higher levels indicate better health on each dimension. <sup>3</sup>Clinical important changes in SF-36 are 5-10 point increases in specific domains.

**Table S6. Reasons for Study Drug Discontinuation by Treatment Assignment.**

| Category                                           | Statin N=430 |       | Placebo N=447 |       | Total N=877 |       |
|----------------------------------------------------|--------------|-------|---------------|-------|-------------|-------|
|                                                    | N            | %     | N             | %     | N           | %     |
| Allergic reaction                                  | 1            | 0.2%  | 0             | 0.0%  | 1           | 0.1%  |
| Side effects involving muscles (includes myalgias) | 10           | 2.3%  | 11            | 2.5%  | 21          | 2.4%  |
| Other side effects                                 | 5            | 1.2%  | 1             | 0.2%  | 6           | 0.7%  |
| MD prescribed incompatible med                     | 17           | 4.0%  | 20            | 4.5%  | 37          | 4.2%  |
| Cardiac Event                                      | 8            | 1.9%  | 6             | 1.3%  | 14          | 1.6%  |
| Diabetes                                           | 14           | 3.3%  | 14            | 3.1%  | 28          | 3.2%  |
| FDA Guidelines on CCBs                             | 16           | 3.7%  | 20            | 4.5%  | 36          | 4.1%  |
| Other Reason                                       | 7            | 1.6%  | 13            | 2.9%  | 20          | 2.2%  |
| Total                                              | 78           | 18.1% | 85            | 19.0% | 163         | 18.6% |

| Group   | OTHER REASON DETAIL                                                                                                                                  |
|---------|------------------------------------------------------------------------------------------------------------------------------------------------------|
| Placebo | DIFFICULTY FOLLOWING PROTOCOL                                                                                                                        |
| Placebo | ELEVATED LIVER ENZYMES AT C24 VISIT                                                                                                                  |
| Placebo | DIAGNOSTIC TESTING FOR DVT                                                                                                                           |
| Placebo | PT HAS ARTHRITIS FOR YEARS. PI DECIDED BEST TO DISCONTINUE MEDICATION ON CONSULTATION WITH PCP.                                                      |
| Placebo | SUBJECT HAS A HAD A HEALTH DECLINE AND CAN NO LONGER COME TO CLINIC VISITS. HE AGREES TO BE FOLLOWED BY PHONE, BUT FOR SAFETY PURPOSES DRUG WAS DC'D |
| Placebo | STROKE                                                                                                                                               |
| Placebo | D.O. DID NOT WANT SUBJECT TO CONTINUE WITH STUDY DRUG.                                                                                               |
| Placebo | SUBJECT MOVING OUT OF STATE AND NO STUDY SITE WITHIN NEW AREA.                                                                                       |
| Placebo | BLOOD PRESSURE AND OTHER HEALTH ISSUES                                                                                                               |
| Placebo | SUBJECT HAD AN INCREASE IN HIS ALCOHOL CONSUMPTION THAT WOULD EXCLUDE HIM FROM TAKING THE STUDY DRUG                                                 |
| Placebo | CARDIAC DOCTOR BELIEVED THE STUDY DRUG MAY BE AFFECTING SUBJECT'S BALANCE.                                                                           |
| Placebo | ALCOHOL ABUSE                                                                                                                                        |
| Placebo | THE PRINCIPAL INVESTIGATOR DISCONTINUED MEDICATIONS DUE TO UNRELIABILITY AND NON-COMPLIANCE OF THE SUBJECT AS PER PROTOCOL                           |
| Statin  | PER PROTOCOL - PERIPHERAL VASCULAR DISEASE                                                                                                           |
| Statin  | LUNG TRANSPLANT                                                                                                                                      |
| Statin  | PATIENT WANTED TO PARTICIPATE IN ANOTHER INTERVENTIONAL STUDY AT THIS POINT. AGREES TO BE FOLLOWED BY PHONE.                                         |

|        |                                                                                                            |
|--------|------------------------------------------------------------------------------------------------------------|
| Statin | INCREASED ALT AND POSSIBLE REACTION                                                                        |
| Statin | LUNG CANCER TREATMENT -- CLINICAL TRIAL.                                                                   |
| Statin | ELEVATED LIVER ENZYMES LIKELY DUE TO UNDISCLOSED ALCOHOL ABUSE, PER PI.                                    |
| Statin | SUBJECT WAS DISCHARGED TO LONGTERM CARE, UNAABLE TO ATTEND CLINIC VISITS, CAUSING SUBJECT EXTREME ANXIETY. |

**Definition of abbreviations:** FDA, Food and Drug Administration; MS, medical doctor; CCBs, calcium channel blockers

**Table S7. Reasons for Withdrawal**

| Category                            | Statin N=430 |      | Placebo N=447 |      | Total N=877 |      |
|-------------------------------------|--------------|------|---------------|------|-------------|------|
|                                     | N            | %    | N             | %    | N           | %    |
| Lost Interest                       | 7            | 1.6% | 6             | 1.3% | 13          | 1.5% |
| Not willing to follow protocol      | 0            | 0%   | 5             | 1.1% | 5           | 0.6% |
| Access to clinic is difficult       | 1            | 0.2% | 2             | 0.4% | 3           | 0.3% |
| Unable to make visits               | 0            | 0%   | 1             | 0.2% | 1           | 0.1% |
| Moving out of area                  | 0            | 0%   | 1             | 0.2% | 1           | 0.1% |
| Medical condition                   | 5            | 1.2% | 3             | 0.7% | 8           | 0.9% |
| Doesn't want to be in control group | 1            | 0.2% | 0             | 0.0% | 1           | 0.1% |
| Adverse event                       | 1            | 0.2% | 1             | 0.2% | 2           | 0.2% |
| Other                               | 1            | 0.2% | 1             | 0.2% | 2           | 0.2% |
| Total                               | 16           | 3.7% | 20            | 4.5% | 36          | 4.1% |

**Table S8. Treatment of Acute Exacerbations with Glucocorticosteroids and Antibiotics in Simvastatin vs. Placebo Groups.**

Average Percent of Acute exacerbation Treated with Steroids,  $p=0.9652$  (t-test)

| TREATMENT GROUP | NUMBER | MEAN % | STD DEV % |
|-----------------|--------|--------|-----------|
| Placebo         | 292    | 76.2   | 35.1      |
| Simvastatin     | 293    | 73.2   | 38.6      |

Average Percent of AECOPD Treated with Antibiotics,  $p=0.5464$ (t-test)

| TREATMENT GROUP | NUMBER | MEAN % | STD DEV % |
|-----------------|--------|--------|-----------|
| Placebo         | 292    | 85.8   | 28.6      |
| Simvastatin     | 293    | 87.2   | 27.5      |

**Definitions:** Average percent of acute exacerbations treated = no. of acute exacerbations treated /no. of acute exacerbations for each person x100, then averaged by group

**Table S9: Lipid Levels at baseline and 12 Months by Treatment Group (Mean ± SDEV)**

| Variable                  | Placebo (N= 204) |              |               | Simvastatin (N=186) |              |               | Difference between Simvastatin and Placebo in 12-month Change | P-value |
|---------------------------|------------------|--------------|---------------|---------------------|--------------|---------------|---------------------------------------------------------------|---------|
|                           | Baseline         | 12 M         | 12M – BL Diff | Baseline            | 12 M         | 12M – BL Diff |                                                               |         |
| Total Cholesterol (mg/dl) | 194.2 ± 35.2     | 190.9 ± 39.4 | -3.4 ± 24.9   | 194.4 ± 35.6        | 163.2 ± 36.9 | -31.2 ± 31.6  | -27.8 ± 28.3                                                  | <.0001  |
| HDL Cholesterol (mg/dl)   | 60.5 ± 24.0      | 60.0 ± 23.5  | -0.5 ± 10.3   | 61.3 ± 21.2         | 63.8 ± 23.9  | 2.5 ± 12.6    | 3.0 ± 11.5                                                    | .012    |
| Triglycerides (mg/dl)     | 96.8 ± 54.7      | 113.6 ± 88.0 | 16.8 ± 59.2   | 96.7 ± 54.2         | 96.1 ± 60.6  | -0.7 ± 53.9   | -17.4 ± 56.7                                                  | .0003   |
| LDL Cholesterol (mg/dl)   | 114.4 ± 27.6     | 107.8 ± 29.0 | -6.6 ± 21.8   | 113.9 ± 28.2        | 80.7 ± 30.8  | -33.2 ± 28.9  | -26.6 ± 25.4                                                  | <.0001  |

## Section C. Figures

Figure S1. Effect of Sex on Time to First Exacerbation. Panel A women; Panel B, men. The trend for men randomized to simvastatin to have reduced time to first exacerbation was not significant,  $p=0.091$ .

Figure S1. Panel A

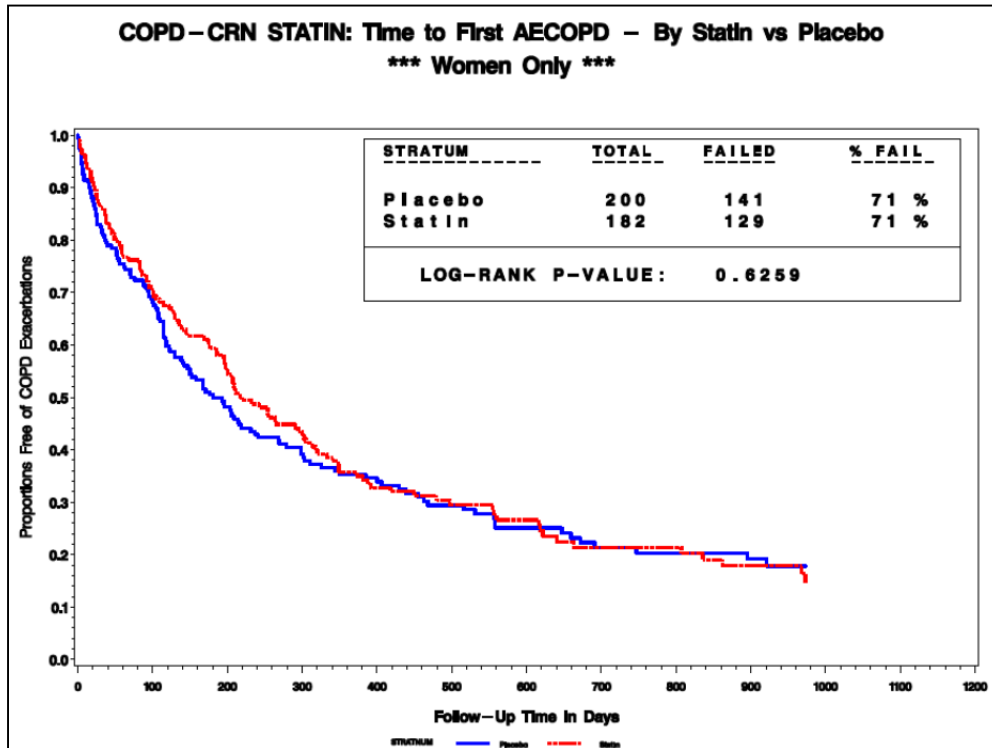

Figure S1. Panel B

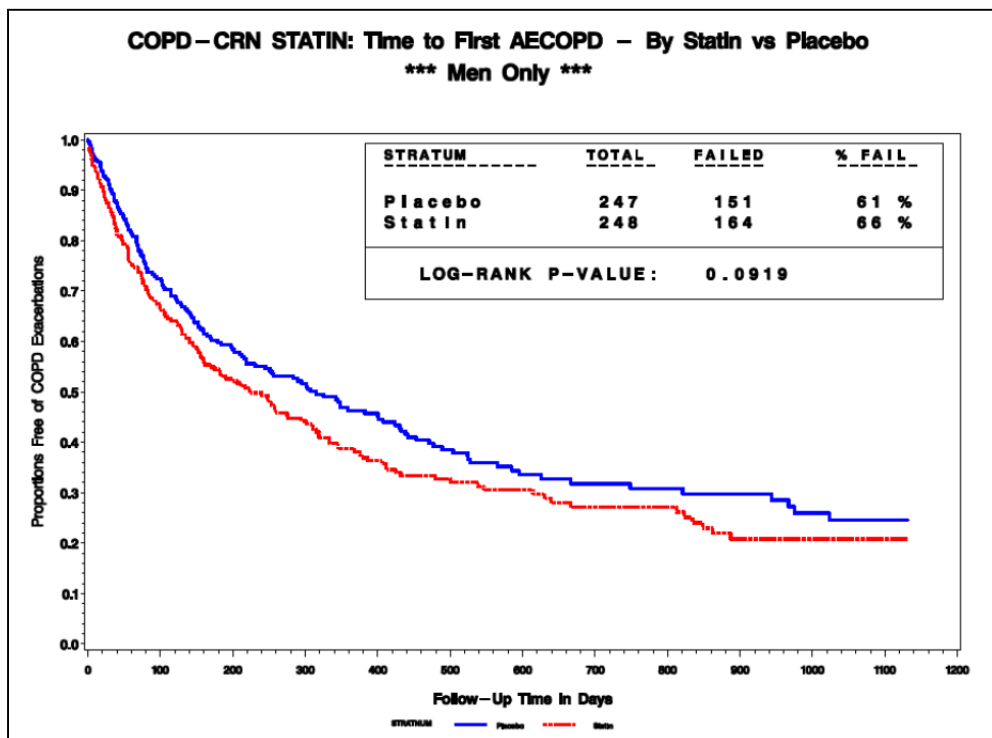

**Figure S2. Histogram of Number of Exacerbations per Participant by Study Drug Assignment. Simvastatin had no beneficial effect on participants with frequent and very frequent exacerbations.**

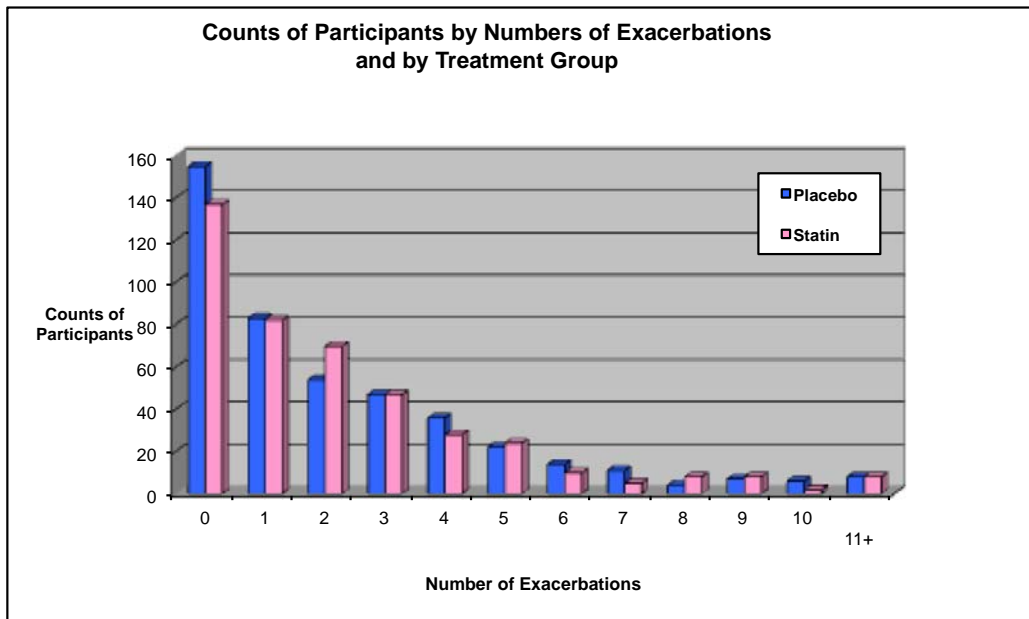



**Figure S3. Forest Plot of Influence of GOLD Stage, Age, Whether Prescribed Oxygen or Not, Smoking Status, Gender and Clinical Center on Response to Simvastatin Treatment.**

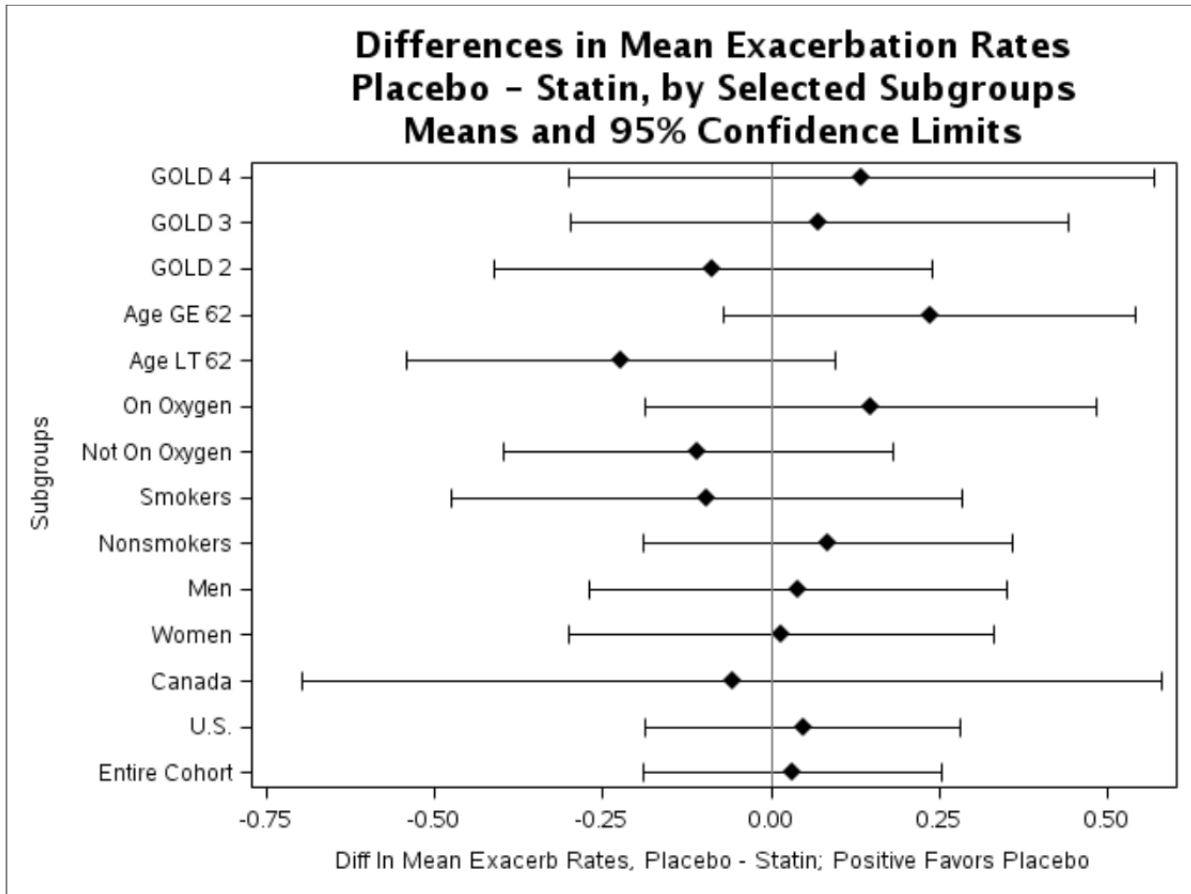

Supplement: NIHMS610520-supplement-Supplement1.pdf [file NIHMS610520-supplement-Supplement1.pdf]
